# Supplementary material for: Unprecedented hexagonal bipyramidal single-ion magnets based on metallacrowns
Source: Royal Society of Chemistry journal article supplement (doi:10.1039/c6cc06924j), 2016-01-01
Supplement: c6cc06924j1.pdf [file c6cc06924j1.pdf]

Electronic Supporting Information (ESI):

## Unprecedented Hexagonal Bipyramidal Single-Ion Magnets Based on Metallacrowns

Quan-Wen Li,<sup>a</sup> Rui-Chen Wan,<sup>a</sup> Yan-Cong Chen,<sup>a</sup> Jun-Liang Liu,<sup>a</sup> Long-Fei Wang,<sup>a</sup> Jian-Hua Jia,<sup>\*a</sup>  
Nicholas F. Chilton<sup>b</sup> and Ming-Liang Tong<sup>\*a</sup>

<sup>a</sup> MOE Key Lab of Bioinorganic and Synthetic Chemistry, School of Chemistry, Sun Yat-Sen University,  
Guangzhou 510275, P. R. China

<sup>b</sup> School of Chemistry, The University of Manchester, Oxford Road, Manchester M13 9PL, U.K.  
E-mail: jiajh3@mail.sysu.edu.cn; tongml@mail.sysu.edu.cn.

### CONTENTS

|                |                                                                                                                                                                                                                                                                                                                                     |
|----------------|-------------------------------------------------------------------------------------------------------------------------------------------------------------------------------------------------------------------------------------------------------------------------------------------------------------------------------------|
| <b>Page 2</b>  | <b>Experimental Section</b> Materials and physical measurements, single crystal X-ray crystallography, synthesis and CASSCF-SO calculations.                                                                                                                                                                                        |
| <b>Page 3</b>  | <b>Fig. S1.</b> Experimental and simulated X-ray powder diffraction (XRPD) patterns for <b>1</b> and <b>2</b> .<br><b>Fig. S2.</b> Thermogravimetric analysis of <b>1</b> and <b>2</b> .                                                                                                                                            |
| <b>Page 4</b>  | <b>Table S1.</b> Crystallographic Data and Structural Refinements for <b>1</b> and <b>2</b> .<br><b>Fig.S3.</b> Outer coordination sphere of <b>1</b> and <b>2</b> .                                                                                                                                                                |
| <b>Page 5</b>  | <b>Table S2.</b> Selected bonds lengths and angles for <b>1</b> and <b>2</b> .<br><b>Table S3.</b> Comparison of equatorial coordination environment in <b>1</b> , <b>2</b> and some other reported equatorial 6-coordination systems.                                                                                              |
| <b>Page 6</b>  | <b>Table S4.</b> Lanthanide ion geometry analysis by using SHAPE 2.0 program.<br><b>Table S5.</b> Comparison of axial Ce(Nd)-O <sub>po</sub> distances and O <sub>po</sub> -Ce(Nd)-O <sub>po</sub> angles in <b>1</b> , <b>2</b> and some other cases.<br><b>Table S6.</b> Cd(II) ion geometry analysis by using SHAPE 2.0 program. |
| <b>Page 7</b>  | <b>Fig.S4.</b> Plots of $M-H/T$ at 2.0, 3.0, and 5.0 K for <b>1</b> and <b>2</b> .<br><b>Table S7</b> Energy levels and eigenstates for compounds <b>1</b> and <b>2</b> .<br><b>Fig. S5.</b> The field-dependent of the relaxation time for <b>1</b> and <b>2</b> at 1.8K.                                                          |
| <b>Page 8</b>  | <b>Table S8.</b> The fitting parameters of field-dependent relaxation data for <b>1</b> and <b>2</b> .<br><b>Fig S6.</b> Temperature dependence of the in-phase $\chi'_m T$ and out-of-phase $\chi''_m$ for <b>1</b> and <b>2</b> .                                                                                                 |
| <b>Page 9</b>  | <b>Fig. S7.</b> Cole–Cole plots for the ac susceptibilities of <b>1</b> and <b>2</b> .<br><b>Table S9.</b> Comparison of <b>1</b> and <b>2</b> with reported Ce(III) and Nd(III) SIMs.                                                                                                                                              |
| <b>Page 10</b> | <b>Fig. S8.</b> The temperature-dependent relaxation time for <b>1</b> and <b>2</b> .<br><b>Table S10.</b> The fitting parameters of temperature-dependent relaxation data.                                                                                                                                                         |
| <b>Page11</b>  | <b>References</b>                                                                                                                                                                                                                                                                                                                   |

## EXPERIMENTAL SECTION

**Materials and Physical Measurements.** The ligand H<sub>2</sub>quinHA was synthesized as literature described<sup>1</sup>. Metal salts and other reagents were commercially available and used as received without further purification. The C, H, and N elemental analyses were carried out with an Elementar Vario-EL CHNS elemental analyzer. X-ray powder diffraction (XRPD) performed on polycrystalline samples were measured at 293 K on Bruker D8 Advance Diffractometer (Cu-K $\alpha$ ,  $\lambda = 1.54056 \text{ \AA}$ ) by scanning over the range of 5-50° with step of 0.2/s. Simulated patterns were generated with Mercury. Magnetic susceptibility measurements were performed with a Quantum Design MPMS-XL7 SQUID. Polycrystalline samples were embedded in vaseline to prevent torqueing. Data were corrected for the diamagnetic contribution calculated from Pascal constants.

**Single Crystal X-ray Crystallography.** Diffraction data were collected on a Bruker APEXIII CCDIII diffractometer with Mo K $\alpha$  radiation ( $\lambda = 0.71073 \text{ \AA}$ ) for complexes **1** and **2** at 120(2) K. The Data indexing and integration were carried out using a Bruker Smart program. The structures were solved by direct methods, and all non-hydrogen atoms were refined anisotropically by least-squares on  $F^2$  using the SHELXTL 2014 program suite<sup>2</sup>. Anisotropic thermal parameters were assigned to all non-hydrogen atoms. The hydrogen atoms attached to carbon, nitrogen and oxygen atoms were placed in idealised positions and refined using a riding model to the atom to which they were attached. The disordered solvent molecules were squeezed<sup>3</sup> and determined by the elemental analysis and thermogravimetric analysis. CCDC 1498048 (**1**) and 1498049 (**2**) contain the supplementary crystallographic data for this paper. These data can be obtained free of charge via [www.ccdc.cam.ac.uk/conts/retrieving.html](http://www.ccdc.cam.ac.uk/conts/retrieving.html) (or from the Cambridge Crystallographic Data Centre, 12 Union Road, Cambridge CB21EZ, UK; fax: (+44)1223-336-033; or [deposit@ccdc.cam.ac.uk](mailto:deposit@ccdc.cam.ac.uk)).

**Synthesis.** [CeCd<sub>3</sub>(Hquinha)<sub>3</sub>(*n*-Bu<sub>3</sub>PO)<sub>2</sub>I<sub>3</sub>]·3EtOH·2H<sub>2</sub>O (**1**): A mixture of H<sub>2</sub>quinHA (0.075 mmol, 14.1 mg) and CdI<sub>2</sub> (0.075 mmol, 27.5 mg) was dissolved in 5 mL EtOH. Under stirring, Ce(NO<sub>3</sub>)<sub>3</sub>·6H<sub>2</sub>O (0.025 mmol, 10.9 mg) and tributylphosphine oxide (0.05 mmol, 10.9 mg) were added to the solution successively. The solution was kept stirring for a minute and then filter before becoming heavy cloudy. Colourless crystals suitable for X-ray analysis were obtained in several days by slow evaporation. Yield: 49.8%. Elemental analysis calcd (%) for CeCd<sub>3</sub>I<sub>6</sub>P<sub>2</sub>C<sub>60</sub>H<sub>97</sub>N<sub>6</sub>O<sub>13</sub>; C: 29.89, H: 4.05, N: 3.49; found (%): C: 29.66, H: 3.82, N: 3.52.

[NdCd<sub>3</sub>(Hquinha)<sub>3</sub>(*n*-Bu<sub>3</sub>PO)<sub>2</sub>I<sub>3</sub>]·3EtOH·2H<sub>2</sub>O (**2**): the procedure was the same as that employed for complex **1**, except that Ce(NO<sub>3</sub>)<sub>3</sub>·6H<sub>2</sub>O was replaced by Nd(NO<sub>3</sub>)<sub>3</sub>·6H<sub>2</sub>O (0.025 mol, 11.0 mg). Colourless crystals were obtained in several days by slow evaporation. Yield: 42.2%. Elemental analysis calcd (%) for NdCd<sub>3</sub>I<sub>6</sub>P<sub>2</sub>C<sub>60</sub>H<sub>97</sub>N<sub>6</sub>O<sub>13</sub>; C: 29.84, H: 4.05, N: 3.48; found (%): C: 29.93, H: 3.92, N: 3.24.

**CASSCF-SO calculations.** The X-ray structures of **1** and **2** were used without optimisation. Basis sets from the ANO-RCC library were employed, with VTZP quality for the Ln atoms, VDZP quality for the first coordination sphere atoms, and VDZ quality for all other atoms. The two electron integrals were Cholesky decomposed with a threshold of  $1 \times 10^{-8}$ . The state-averaged CASSCF calculations were performed using 1 electron in 7 orbitals with 7 doublets for **1**, and 3 electrons in 7 orbitals with 35 quartets and 112 doublets for **2**. All roots were included in the spin orbit mixing for both complexes. The CF decomposition of the ground  $J = 5/2$  and  $J = 9/2$  multiplets for **1** and **2**, respectively, were performed with the SINGLE\_ANISO module.

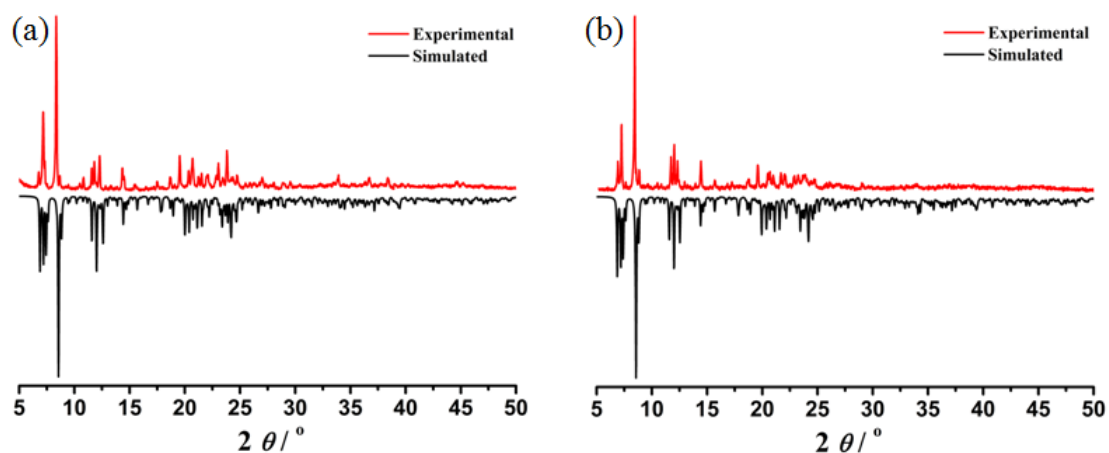

**Fig. S1.** Experimental and simulated X-ray powder diffraction (XRPD) patterns for **1** (a) and **2** (b).

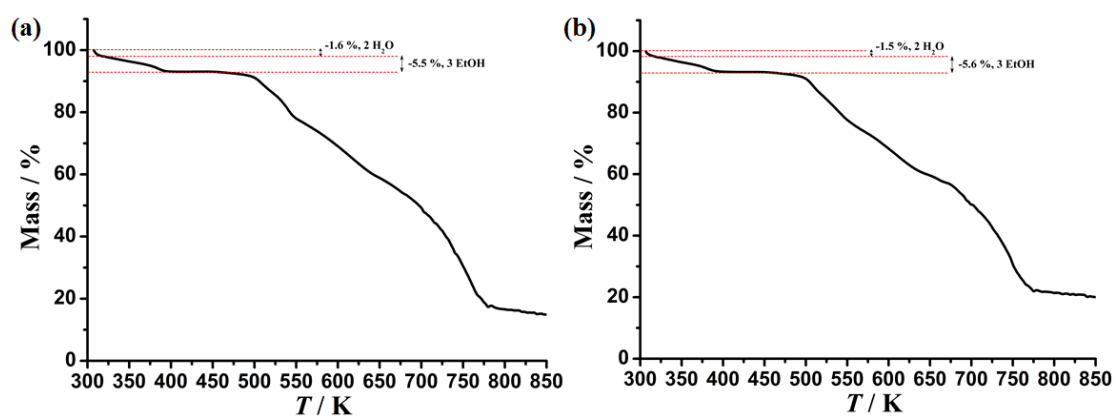

**Fig. S2.** Thermogravimetric analysis of **1** (a) and **2** (b). The red dash lines show the two stages of escaping of solvent molecules. When the temperature increases, the two disordered  $\text{H}_2\text{O}$  molecules escape first. Then, the three ethanol molecules connected to the  $\{\text{LnCd}_3\}$  core with  $\text{O-H}\cdots\text{I}$  weak interactions escape in higher temperatures.

**Table S1.** Crystallographic Data and Structural Refinements for **1** and **2**.

| Compound                                                                                 | <b>1</b>                                                                                                       | <b>2</b>                                                                                                       |
|------------------------------------------------------------------------------------------|----------------------------------------------------------------------------------------------------------------|----------------------------------------------------------------------------------------------------------------|
| Formula                                                                                  | CeCd <sub>3</sub> I <sub>6</sub> P <sub>2</sub> C <sub>60</sub> H <sub>93</sub> N <sub>6</sub> O <sub>11</sub> | NdCd <sub>3</sub> I <sub>6</sub> P <sub>2</sub> C <sub>60</sub> H <sub>93</sub> N <sub>6</sub> O <sub>11</sub> |
| Formula weight                                                                           | 2375.06                                                                                                        | 2379.18                                                                                                        |
| Temperature / K                                                                          | 120(2)                                                                                                         | 120(2)                                                                                                         |
| Crystal system                                                                           | Monoclinic                                                                                                     | Monoclinic                                                                                                     |
| Space group                                                                              | <i>P2<sub>1</sub>/c</i>                                                                                        | <i>P2<sub>1</sub>/c</i>                                                                                        |
| <i>a</i> / Å                                                                             | 26.1665(13)                                                                                                    | 26.2751(9)                                                                                                     |
| <i>b</i> / Å                                                                             | 15.2608(8)                                                                                                     | 15.2788(6)                                                                                                     |
| <i>c</i> / Å                                                                             | 23.2073(10)                                                                                                    | 23.1448(7)                                                                                                     |
| $\beta$ / °                                                                              | 114.863(1)                                                                                                     | 114.769(1)                                                                                                     |
| <i>V</i> / Å <sup>3</sup>                                                                | 8408.3(7)                                                                                                      | 8436.7(5)                                                                                                      |
| <i>Z</i>                                                                                 | 4                                                                                                              | 4                                                                                                              |
| $\rho_{\text{calcd.}}$ (g/cm <sup>3</sup> )                                              | 1.876                                                                                                          | 1.873                                                                                                          |
| $\mu$ (mm <sup>-1</sup> )                                                                | 3.571                                                                                                          | 3.635                                                                                                          |
| <i>F</i> (000)                                                                           | 4532                                                                                                           | 4540                                                                                                           |
| Reflections collected                                                                    | 59415                                                                                                          | 61138                                                                                                          |
| Independent reflections                                                                  | 19263                                                                                                          | 19369                                                                                                          |
| GOF on <i>F</i> <sup>2</sup>                                                             | 1.053                                                                                                          | 1.013                                                                                                          |
| <i>R</i> <sub>1</sub> , <i>wR</i> <sub>2</sub> [ <i>I</i> ≥ 2σ( <i>I</i> )] <sup>a</sup> | 0.0626, 0.1298                                                                                                 | 0.0415, 0.0745                                                                                                 |
| <i>R</i> <sub>1</sub> , <i>wR</i> <sub>2</sub> (all data) <sup>b</sup>                   | 0.1048, 0.1449                                                                                                 | 0.0732, 0.0834                                                                                                 |
| CCDC No.                                                                                 | 1498048                                                                                                        | 1498049                                                                                                        |

<sup>a</sup>  $R_1 = \sum ||F_o| - |F_c|| / \sum |F_o|$ . <sup>b</sup>  $wR_2 = [\sum w(F_o^2 - F_c^2)^2 / \sum w(F_o^2)^2]^{1/2}$ .

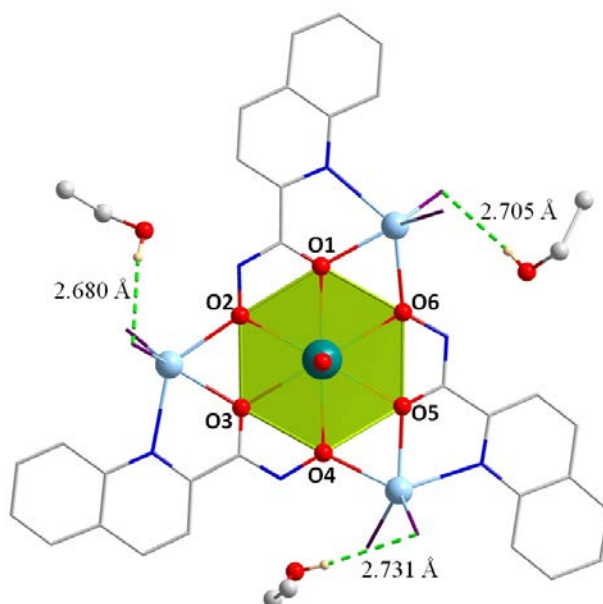

**Fig.S3.** Outer coordination sphere, connected with O–H···I weak interactions (green dash lines) of **1** and **2**. H atoms of the ligands are omitted for clarity. The colours of teal, pale blue, violet, pink, blue, red and light grey represent for Ln, Cd, I, P, N, O and C atoms, respectively. The green hexagonal area shows the planar coordination environment of Ln ion.

**Table S2.** Selected bonds lengths [Å] and angles [°] for **1** and **2**.\*

| <b>1</b>  |           | <b>2</b>  |            |
|-----------|-----------|-----------|------------|
| Ce1-O1    | 2.531(5)  | Nd1-O1    | 2.508(3)   |
| Ce1-O2    | 2.516(6)  | Nd1-O2    | 2.483(3)   |
| Ce1-O3    | 2.535(5)  | Nd1-O3    | 2.508(3)   |
| Ce1-O4    | 2.532(6)  | Nd1-O4    | 2.511(4)   |
| Ce1-O5    | 2.514(5)  | Nd1-O5    | 2.488(3)   |
| Ce1-O6    | 2.537(6)  | Nd1-O6    | 2.526(3)   |
| Ce1-O7    | 2.356(6)  | Nd1-O7    | 2.312(4)   |
| Ce1-O8    | 2.317(6)  | Nd1-O8    | 2.290(4)   |
| O1-Ce1-O2 | 61.00(18) | O1-Nd1-O2 | 61.57(11)  |
| O2-Ce1-O3 | 59.62(17) | O2-Nd1-O3 | 59.80(11)  |
| O3-Ce1-O4 | 60.78(18) | O3-Nd1-O4 | 61.26(11)  |
| O4-Ce1-O5 | 59.91(18) | O4-Nd1-O5 | 59.95(11)  |
| O5-Ce1-O6 | 60.53(17) | O5-Nd1-O6 | 60.73(11)  |
| O6-Ce1-O1 | 60.17(17) | O6-Nd1-O1 | 59.77(11)  |
| O7-Ce1-O8 | 178.3(3)  | O7-Nd1-O8 | 179.00(14) |

\* The atoms are labelled as shown in Fig. S3 and the text.

**Table S3.** Comparison of equatorial coordination environment in **1**, **2** and some other reported equatorial 6-coordination systems.

| Compounds*                                                                                                                        | Ce(Nd)-O <sub>eq</sub> distances (Å) | Cavity radius (Å)** | Range of $\theta$ angles | Ref       |
|-----------------------------------------------------------------------------------------------------------------------------------|--------------------------------------|---------------------|--------------------------|-----------|
| <b>1</b>                                                                                                                          | 2.514–2.537                          | 1.24                | 59.63–61.00              | This work |
| [Cu <sub>3</sub> Ce(L <sup>1</sup> )(NO <sub>3</sub> ) <sub>3</sub> (MeOH) <sub>3</sub> ]                                         | 2.487–2.621                          | 1.26                | 57.42–62.03              | 4         |
| [Ce(18-C-6)(L <sup>2</sup> ) <sub>2</sub> ][Ce(L <sup>2</sup> ) <sub>4</sub> ]                                                    | 2.582–2.637                          | 1.33                | 59.15–62.09              | 5         |
| [Ce(18-C-6)(BH <sub>4</sub> ) <sub>2</sub> ](BPh <sub>4</sub> )                                                                   | 2.617–2.660                          | 1.34                | 59.81–61.14              | 6         |
| [Ce(18-C-6)(H <sub>2</sub> O)Cl <sub>2</sub> Cl]·2H <sub>2</sub> O                                                                | 2.576–2.641                          | 1.39                | 60.34–62.85              | 7         |
| <b>2</b>                                                                                                                          | 2.483–2.527                          | 1.22                | 59.77–61.57              | This work |
| [Nd(18-C-6)(BH <sub>4</sub> ) <sub>2</sub> ](BPh <sub>4</sub> )                                                                   | 2.624–2.671                          | 1.34                | 59.36–60.45              | 6         |
| [NdB <sub>3</sub> (L <sup>3</sup> ) <sub>6</sub> (C <sub>4</sub> H <sub>8</sub> O) <sub>3</sub> ]·C <sub>4</sub> H <sub>8</sub> O | 2.406–2.430                          | 1.09                | 54.05–64.51              | 8         |
| [Nd(18-C-6)(H <sub>2</sub> O) <sub>2</sub> Cl]Cl <sub>2</sub> ·2H <sub>2</sub> O                                                  | 2.541–2.608                          | 1.37                | 60.96–64.15              | 9         |

\*O<sub>eq</sub> stands for equatorial coordinated oxygen atoms. L<sup>1</sup> = [3+3] macrocyclic ligands; L<sup>2</sup> = N(SiMe<sub>3</sub>)Ph<sup>F</sup>, Ph<sup>F</sup> = pentafluorophenyl; L<sup>3</sup> =  $\eta^2$ -catechol- $\mu$ -catecholborate.

\*\*The cavity radius is calculated according to a literature<sup>10</sup>. The method can be described as:

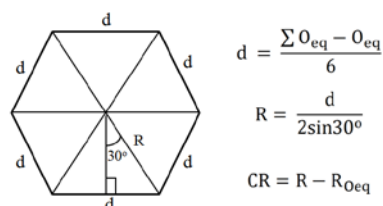

CR = Cavity Radius; R<sub>O<sub>eq</sub></sub> means the radius of O<sub>eq</sub> atoms on the ring with an estimated value of 1.30 Å. See details in the literature<sup>10</sup>.

**Table S4.** Lanthanide geometry analysis by using SHAPE 2.0 program.\*

|     | HBPY( $D_{6h}$ ) | CU( $O_h$ ) | SAPR( $D_{4d}$ ) | TDD( $D_{2d}$ ) |
|-----|------------------|-------------|------------------|-----------------|
| Ce1 | 0.456            | 6.862       | 15.417           | 12.931          |
| Nd1 | 0.644            | 6.600       | 14.634           | 12.157          |

\*HBPY = Hexagonal bipyramid; Cu = Cube; SAPR = Square antiprism; TDD = Triangular dodecahedron.

**Table S5.** Comparison of axial Ce(Nd)-O<sub>po</sub> distances and O<sub>po</sub>-Ce(Nd)-O<sub>po</sub> angles in **1**, **2** and some other cases.

| Compounds*                                                                                                            | Ce(Nd)-O <sub>po</sub> distances (Å) | O <sub>po</sub> -Ce(Nd)-O <sub>po</sub> angle (°) | Ref       |
|-----------------------------------------------------------------------------------------------------------------------|--------------------------------------|---------------------------------------------------|-----------|
| <b>1</b>                                                                                                              | 2.317, 2.356                         | 178.3                                             | This work |
| [Ce(L <sup>4</sup> ) <sub>2</sub> (H <sub>2</sub> O) <sub>2</sub> Cl <sub>3</sub> ]                                   | 2.371                                | 169.9                                             | 11        |
| <b>2</b>                                                                                                              | 2.290, 2.312                         | 179.0                                             | This work |
| [Nd(L <sup>5</sup> )(H <sub>2</sub> O) <sub>5</sub> ]I <sub>3</sub> ·(L <sup>5</sup> ) <sub>2</sub> ·H <sub>2</sub> O | 2.285, 2.294                         | 174.4                                             | 12        |
| [Nd(L <sup>6</sup> ) <sub>2</sub> (NO <sub>3</sub> ) <sub>3</sub> (H <sub>2</sub> O)]·2EtOH                           | 2.345, 2.369                         | 151.7                                             | 13        |
| [Nd(L <sup>7</sup> ) <sub>2</sub> (NO <sub>3</sub> ) <sub>3</sub> (H <sub>2</sub> O)]                                 | 2.349, 2.353                         | 148.66                                            | 14        |

\*L<sup>4</sup> = *P,P*-dimorpholino-*N*-phenylphosphinic amide; L<sup>5</sup> = <sup>t</sup>Bu (NH<sup>*i*</sup>Pr)<sub>2</sub>PO; L<sup>6</sup> = (<sup>t</sup>Bu)<sub>3</sub>PO; L<sup>7</sup> = 2-(2-(dio-tolylphosphoryl)ethyl)benzo[d]oxazole;

**Table S6.** Cd(II) ion geometry analysis by using SHAPE 2.0 program and the parameter  $\tau$  of deviation from trigonal bipyramid and square pyramid.\*

|                 | PP     | VOC    | TBPY  | SPY   | JTBPY  | $\tau$ |
|-----------------|--------|--------|-------|-------|--------|--------|
| Cd1 in <b>1</b> | 33.515 | 10.053 | 5.334 | 6.204 | 10.421 | 0.22   |
| Cd2 in <b>1</b> | 35.413 | 10.100 | 5.098 | 5.963 | 10.333 | 0.23   |
| Cd3 in <b>1</b> | 32.424 | 10.463 | 5.352 | 6.497 | 10.738 | 0.24   |
| Cd1 in <b>2</b> | 33.017 | 10.159 | 5.516 | 6.276 | 10.643 | 0.21   |
| Cd2 in <b>2</b> | 34.934 | 10.077 | 5.240 | 5.921 | 10.598 | 0.23   |
| Cd3 in <b>2</b> | 32.273 | 10.797 | 5.486 | 6.684 | 10.958 | 0.23   |

\*PP = Pentagon; VOC = Vacant octahedron; TBPY = Trigonal bipyramid; SPY = Spherical square pyramid; JTBPY = Johnson Trigonal.

The parameter  $\tau$  is calculated according to the literature.<sup>15</sup>

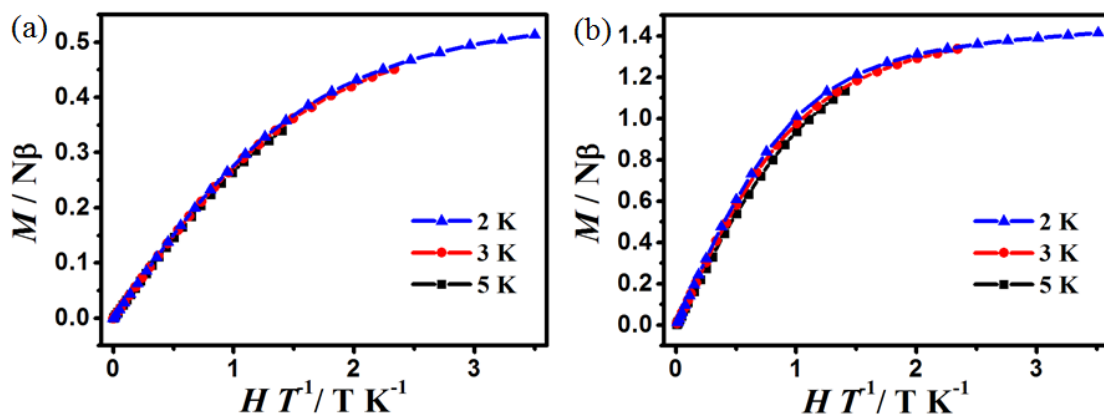

**Fig.S4.** Plots of  $M-H/T$  at 2.0, 3.0, and 5.0 K for **1** (a) and **2** (b). The solid line is a guide for the eyes.

**Table S7.** Energy levels and eigenstates for compounds **1** and **2** calculated with CASSCF-SO. Wavefunctions decomposed along the pseudo- $D_6$  axis.

|          | Energy<br>/ $\text{cm}^{-1}$ | $g_x$ | $g_y$ | $g_z$ | Angle<br>/ $^\circ$ | Crystal field wavefunctions $ m_j\rangle$                                               |
|----------|------------------------------|-------|-------|-------|---------------------|-----------------------------------------------------------------------------------------|
| <b>1</b> | 0                            | 0.02  | 0.10  | 2.48  | -                   | $96\% \pm 3/2\rangle$                                                                   |
|          | 303                          | 0.22  | 0.27  | 3.82  | 23                  | $97\% \pm 5/2\rangle$                                                                   |
|          | 784                          | 0.60  | 2.46  | 2.58  | 83                  | $81\% \pm 1/2\rangle + 19\% \mp 1/2\rangle$                                             |
| <b>2</b> | 0                            | 0.07  | 0.21  | 4.18  | -                   | $71\% \pm 9/2\rangle + 29\% \mp 3/2\rangle$                                             |
|          | 104                          | 0.36  | 2.49  | 2.66  | 87                  | $39\% \pm 5/2\rangle + 25\% \mp 5/2\rangle + 20\% \mp 7/2\rangle + 15\% \pm 7/2\rangle$ |
|          | 215                          | 0.55  | 2.72  | 4.08  | 87                  | $76\% \pm 1/2\rangle + 17\% \mp 1/2\rangle$                                             |
|          | 289                          | 0.25  | 0.89  | 1.67  | 81                  | $67\% \pm 3/2\rangle + 27\% \mp 9/2\rangle$                                             |
|          | 586                          | 1.80  | 2.85  | 2.96  | 83                  | $62\% \pm 7/2\rangle + 36\% \mp 5/2\rangle$                                             |

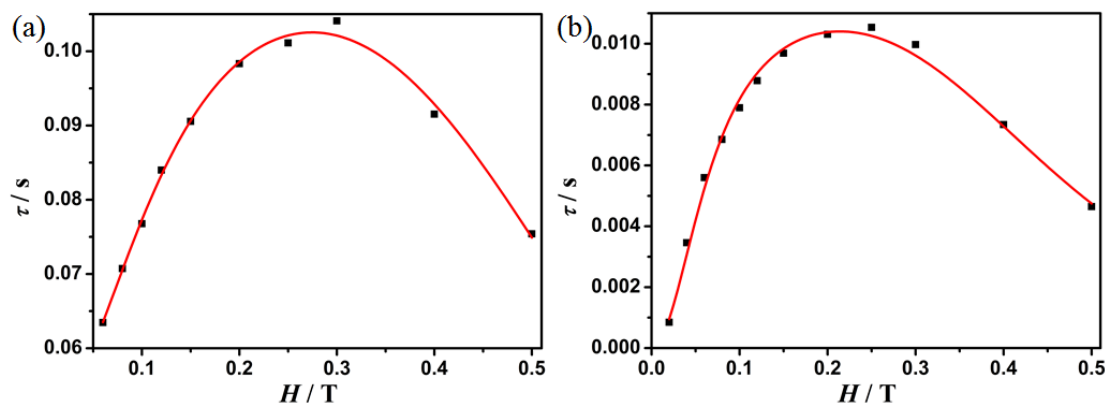

**Fig.S5.** The field-dependent relaxation time for **1** (a) and **2** (b) at 1.8K. The red lines are the fitness with equation (2) in the text.

**Table S8.** The fitting parameters of field-dependent relaxation data with the direct, QTM and field-independent processes for **1(a)** and **2(b)**.

|          | $A$ ( $s^{-1} \text{ Oe}^{-4} \text{ K}^{-1}$ ) | $B_1$ ( $s^{-1}$ ) | $B_2$ ( $\text{Oe}^{-2}$ ) | $D$ ( $s^{-1}$ ) |
|----------|-------------------------------------------------|--------------------|----------------------------|------------------|
| <b>1</b> | 4.13E-15                                        | 11.29              | 1.50E-6                    | 8.42             |
| <b>2</b> | 1.08E-13                                        | 5330.37            | 1.36E-4                    | 83.40            |

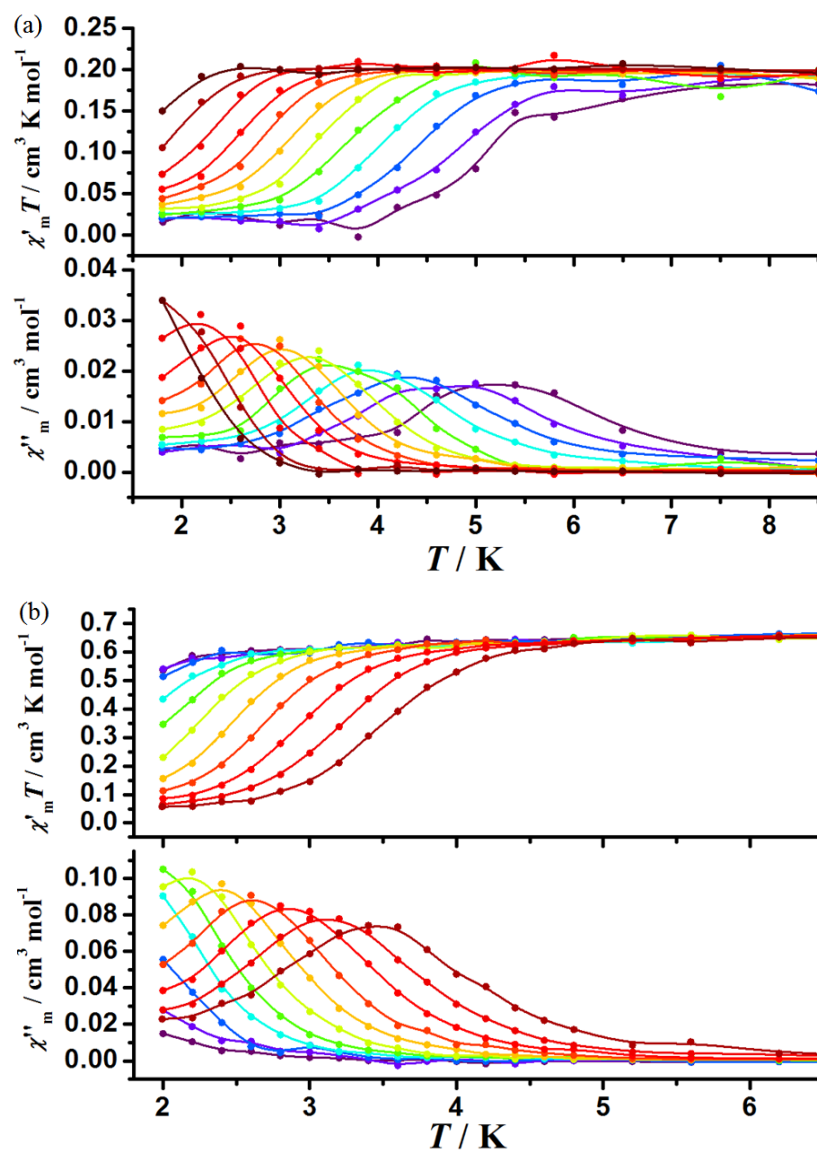

**Fig.S6.** Temperature dependence of the in-phase  $\chi'_m T$  product and out-of-phase  $\chi''_m$  in a 1500 Oe dc field for **1** (a) and a 2500 Oe dc field for **2** (b). The solid lines are guides for the eyes.



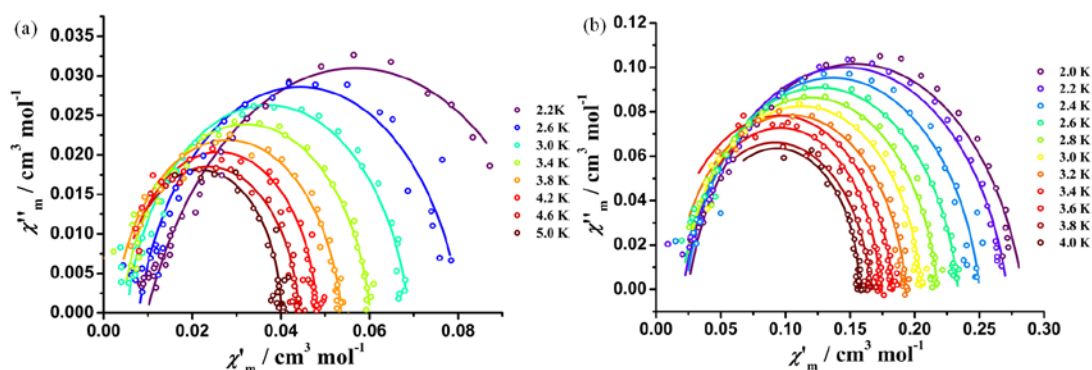

**Fig.S7.** Cole–Cole plots for the ac susceptibilities in a 1500 Oe dc field for **1** (a) and a 2500 Oe dc field for **2** (b). The solid lines are the best fit to the generalized Debye model.

**Table S9.** Comparison of **1** and **2** with reported Ce(III) and Nd(III) SIMs.

| Compounds*                                                                                                                                    | $U_{\text{eff}} / \text{K}$ | $\tau_0 / \text{s}$    | Ref       |
|-----------------------------------------------------------------------------------------------------------------------------------------------|-----------------------------|------------------------|-----------|
| <b>1</b>                                                                                                                                      | 27                          | $8.2 \times 10^{-7}$   | This work |
| $[\text{CeZn}_2(\text{L}^8)_2\text{I}_2(\text{MeOH})]\text{BPh}_4$                                                                            | 21.2                        | $1.6 \times 10^{-7}$   | 16        |
| $[\text{CeZn}_2(\text{L}^9)_2(\text{AcO})_2]\text{BPh}_4$                                                                                     | 37                          | $2.7 \times 10^{-7}$   | 17        |
| $\text{Li}(\text{DME})_3[\text{Ce}(\text{COT}'')]_2$                                                                                          | 30                          | $1.2 \times 10^{-6}$   | 18        |
| $[\text{Ce}(\text{dmsO})_8][\text{Ce}(\eta^2\text{-NO}_3)_2(\text{dmsO})_4(\alpha\text{-Mo}_8\text{O}_{26})_{0.5}][\text{Mo}_6\text{O}_{19}]$ | 24.4                        | $2.56 \times 10^{-7}$  | 19        |
|                                                                                                                                               | 4.4                         | $2.09 \times 10^{-5}$  |           |
|                                                                                                                                               | 9.1                         | $1.12 \times 10^{-6}$  |           |
| $[\text{Ce}(\text{NO}_3)\{\text{Zn}(\text{L}^9)(\text{SCN})\}_2] \cdot \text{CH}_3\text{CN}$                                                  | 35.7                        | $2.2 \times 10^{-7}$   | 20        |
| <b>2</b>                                                                                                                                      | 22                          | $3.9 \times 10^{-7}$   | This work |
| $[\text{Nd}(\text{NO}_3)\{\text{Zn}(\text{L}^9)(\text{SCN})\}_2] \cdot \text{CH}_3\text{CN}$                                                  | 38.5                        | $2.07 \times 10^{-7}$  | 20        |
| $\text{NdTp}_3$                                                                                                                               | 4.08                        | $1.2 \times 10^{-5}$   | 21        |
| $\{[\text{Ln}_2(\text{CNCH}_2\text{COO})_6(\text{H}_2\text{O})_4]_2\text{H}_2\text{O}\}_n$                                                    | 26.6                        | $1.75 \times 10^{-7}$  | 22        |
| $\text{Na}_9[\text{Nd}(\text{W}_5\text{O}_{18})_2]_3 \cdot 2\text{H}_2\text{O}$                                                               | 74                          | $3.55 \times 10^{-10}$ | 23        |
| $[\text{Li}(\text{DME})_3][\text{Nd}(\text{COT}'')]_2$                                                                                        | 21                          | $5.5 \times 10^{-5}$   | 24        |
| $[\text{Nd}(\text{L}^5)(\text{H}_2\text{O})_5]\text{I}_3 \cdot (\text{L}^5)_2 \cdot \text{H}_2\text{O}$                                       | 39.21                       | $8.98 \times 10^{-7}$  | 12        |

\* $\text{L}^8 = 6,6'-(1\text{E},1'\text{E})-(2,2\text{-dimethylpropane-1,3-diyl})\text{bis}(\text{azan-1-yl-1-ylidene})\text{bis}(\text{methan-1-yl-1-ylidene})\text{bis}(2\text{-methoxyphenol})$ ;

$\text{L}^9 = 6,6'-(1\text{E},1'\text{E})-(\text{ethane-1,2-diylbis}(\text{azan-1-yl-1-ylidene}))\text{bis}(\text{methan-1-yl-1-ylidene})\text{bis}(2\text{-methoxyphenol})$ ;

$\text{COT}'' = \text{bis}(\text{trimethylsilyl})\text{cyclooctatetraenyldianion}$ ;

$\text{Tp}^- = \text{trispyrazolylborate}$ .

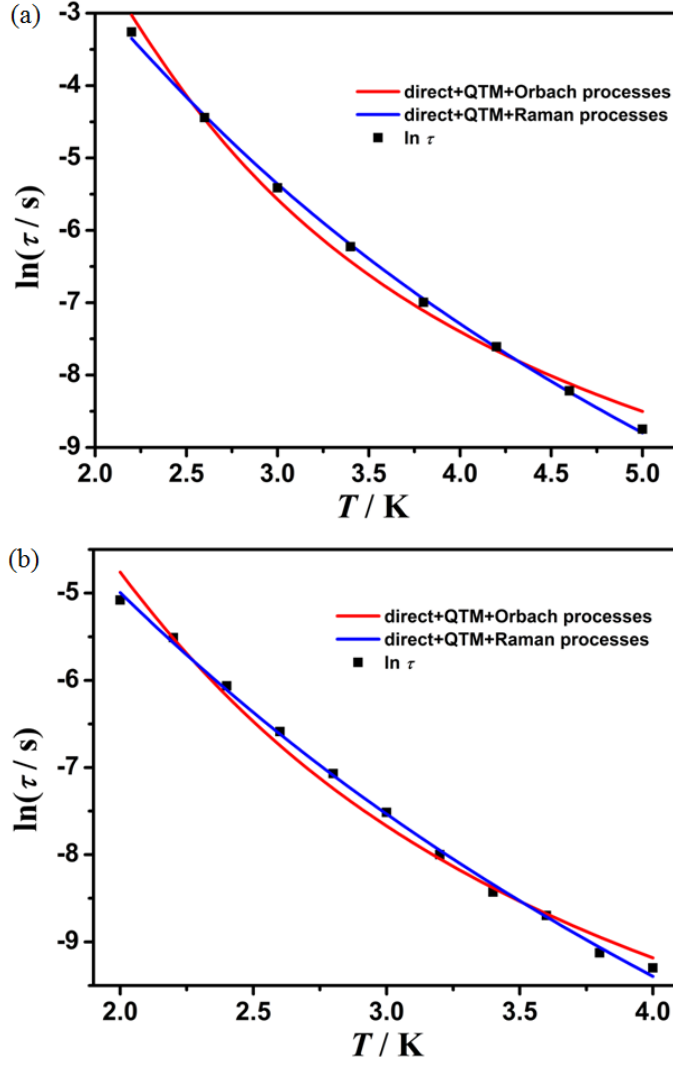

**Fig.S8.** The temperature-dependent relaxation time for **1** (a) and **2** (b) at 1.8K. The red lines are the fitness with direct, QTM and Orbach processes, while the blue lines are the fitness with direct, QTM and Raman processes.

**Table S10.** The fitting parameters of temperature-dependent relaxation data with the direct, QTM, Raman and Orbach processes for **1** (a) and **2** (b).\*

|          | Processes         | $A$ ( $s^{-1} \text{Oe}^{-4} \text{K}^{-1}$ ) | $B_1$ ( $s^{-1}$ ) | $B_2$ ( $\text{Oe}^{-2}$ ) | $C$ ( $s^{-1} \text{K}^{-n}$ ) | $n$ ( $s^{-1}$ ) | $\tau_0$ (s) | $U_{\text{eff}}$ (K) |
|----------|-------------------|-----------------------------------------------|--------------------|----------------------------|--------------------------------|------------------|--------------|----------------------|
| <b>1</b> | direct+QTM+Raman  | 4.13E-15                                      | 11.29              | 1.50E-6                    | 0.13                           | 6.75             | /            | /                    |
|          | direct+QTM+Orbach | 4.13E-15                                      | 11.29              | 1.50E-6                    | /                              | /                | 2.48E-6      | 22                   |
| <b>2</b> | direct+QTM+Raman  | 1.08E-13                                      | 5330.37            | 1.36E-4                    | 1.47                           | 6.50             | /            | /                    |
|          | direct+QTM+Orbach | 1.08E-13                                      | 5330.37            | 1.36E-4                    | /                              | /                | 1.08E-6      | 18                   |

\*The parameters  $A$ ,  $B_1$ ,  $B_2$  are fixed in fitting field-dependent relaxation times, see Fig. S5 and Table S8.

## References:

1. J. Jankolovits, J. W. Kampf and V. L. Pecoraro, *Inorg. Chem.*, 2014, **53**, 7534.
2. G. M. Sheldrick, *Acta Crystallogr.*, 2008, **A64**, 112.
3. A. L. Spek, *Acta Crystallogr.*, 2015, **C71**, 9.
4. H. L. C. Feltham, R. Clérac, L. Ungur, V. Vieru, L. F. Chibotaru, A. K. Powell and S. Brooker, *Inorg. Chem.*, 2012, **51**, 10603-10612.
5. H. Yin, J. R. Robinson, P. J. Carroll, P. J. Walsh and E. J. Schelter, *Chem. Commun.*, 2014, **50**, 3470-3472.
6. T. Arliguie, L. Belkhiria, S.-E. Bouaoud, P. Thuéry, C. Villiers, A. Boucekkine and M. Ephritikhine, *Inorg. Chem.*, 2009, **48**, 221-230.
7. R. D. Rogers, A. N. Rollins, R. D. Etzenhouser, E. J. Voss and C. B. Bauer, *Inorg. Chem.*, 1993, **32**, 3451-3462.
8. R. K. Das, E. Barnea, T. Andrea, M. Kapon, N. Fridman, M. Botoshansky and M. S. Eisen, *Organometallics*, 2015, **34**, 742-752.
9. R. D. Rogers, A. N. Rollins, R. F. Henry, J. S. Murdoch, R. D. Etzenhouser, S. E. Huggins and L. Nunez, *Inorg. Chem.*, 1991, **30**, 4946-4954.
10. C. M. Zaleski, C.-S. Lim, A. D. Cutland-Van Noord, J. W. Kampf and V. L. Pecoraro, *Inorg. Chem.*, 2011, **50**, 7707-7717.
11. K. Gholivand, H. R. Mahzouni and M. D. Esrafilii, *Dalton Trans.*, 2012, **41**, 1597-1608.
12. S. K. Gupta, T. Rajeshkumar, G. Rajaraman and R. Murugavel, *Chem. Commun.*, 2016, **52**, 7168-7171.
13. A. Bowden, S. J. Coles, M. B. Pitak and A. W. G. Platt, *Inorg. Chem.*, 2012, **51**, 4379-4389.
14. S. Pailloux, C. E. Shirima, E. N. Duesler, K. A. Smith and R. T. Paine, *Polyhedron*, 2011, **30**, 2746-2757.
15. A. W. Addison, T. N. Rao, J. Reedijk, J. van Rijn and G. C. Verschoor, *J. Chem. Soc., Dalton Trans.*, 1984, 1349-1356.
16. S. Hino, M. Maeda, K. Yamashita, Y. Kataoka, M. Nakano, T. Yamamura, H. Nojiri, M. Kofu, O. Yamamuro and T. Kajiwara, *Dalton Trans.*, 2013, **42**, 2683-2686.
17. S. Hino, M. Maeda, Y. Kataoka, M. Nakano, T. Yamamura and T. Kajiwara, *Chem. Lett.*, 2013, **42**, 1276-1278.
18. J. J. Le Roy, I. Korobkov, J. E. Kim, E. J. Schelter and M. Murugesu, *Dalton Trans.*, 2014, **43**, 2737-2740.
19. A. B. Khelifa, M. S. Belkhiria, G. Huang, S. Freslon, O. Guillou and K. Bernot, *Dalton Trans.*, 2015, **44**, 16458-16464.
20. C. Takehara, P. L. Then, Y. Kataoka, M. Nakano, T. Yamamura and T. Kajiwara, *Dalton Trans.*, 2015, **44**, 18276-18283.
21. J. D. Rinehart and J. R. Long, *Dalton Trans.*, 2012, **41**, 13572-13574.
22. A. Arauzo, A. Lazarescu, S. Shova, E. Bartolome, R. Cases, J. Luzon, J. Bartolome and C. Turta, *Dalton Trans.*, 2014, **43**, 12342-12356.
23. J. J. Baldoví, J. M. Clemente-Juan, E. Coronado, Y. Duan, A. Gaita-Ariño and C. Giménez-Saiz, *Inorg. Chem.*, 2014, **53**, 9976-9980.
24. J. J. Le Roy, S. I. Gorelsky, I. Korobkov and M. Murugesu, *Organometallics*, 2015, **34**, 1415-1418.
